# Supplementary material
Source: PubMed Central journal article supplement (PMC2141806)

**A**

|             |   |   |   |   |
|-------------|---|---|---|---|
| IL-27:      | - | + | + | + |
| Control Ab: | - | - | + | - |
| IL-27 nAb:  | - | - | - | + |

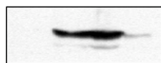

immunoblot  
P-STAT1

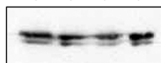

STAT1

**B**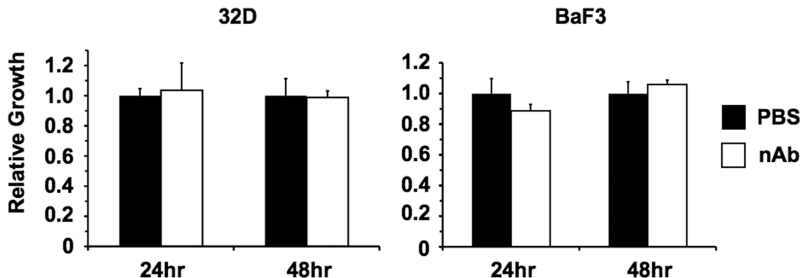

Viability at 48 hr:

PBS: 99.7% +/-0.3

nAb: 98.8% +/-2.1

Viability at 48 hr:

PBS: 99.5% +/-0.9

nAb: 98.7% +/-1.4

Supplement: pnas_0702388104_1.pdf [file pnas_0702388104_1.pdf]

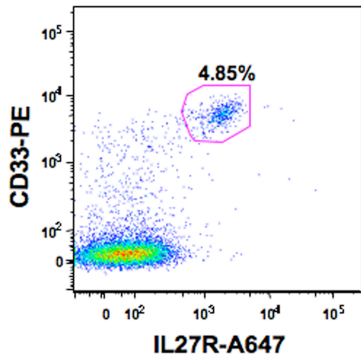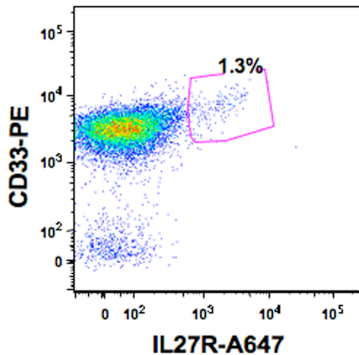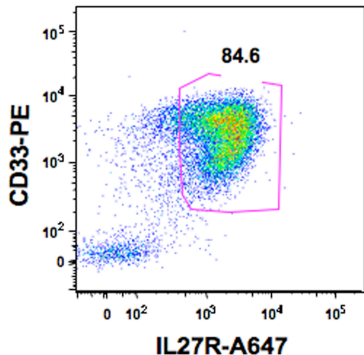

Supplement: pnas_0702388104_2.pdf [file pnas_0702388104_2.pdf]

**32D****BaF3****vector****IL27R****vector****IL27R**immunoblot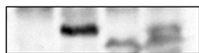**P-JAK2**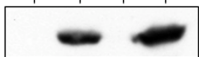**P-STAT5**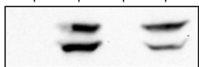**P-STAT1**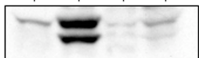**P-STAT3**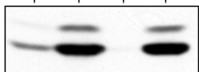**P-ERK**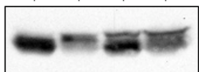**STAT5**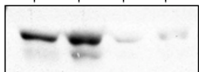**STAT3**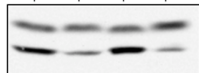**ERK1/2**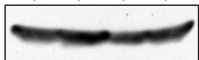**actin**

Supplement: pnas_0702388104_3.pdf [file pnas_0702388104_3.pdf]

**A**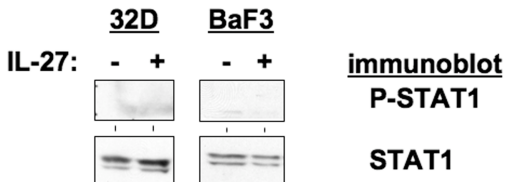**B**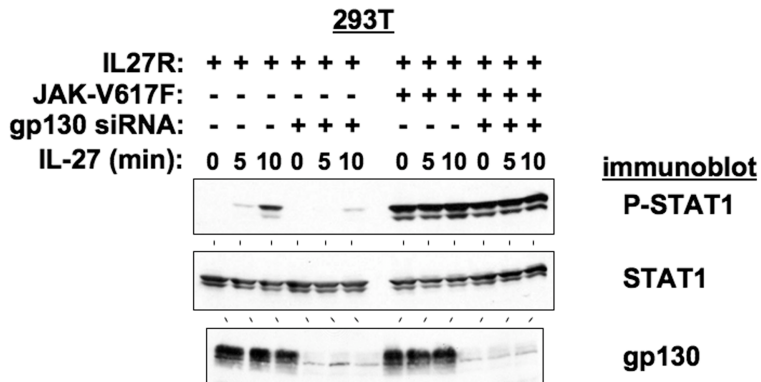

Supplement: pnas_0702388104_4.pdf [file pnas_0702388104_4.pdf]
